# Supplementary material
Source: PubMed Central journal article supplement (PMC4528962)
Supplement: NIHMS680477-supplement-6.pdf [file NIHMS680477-supplement-6.pdf]

**Table S1. Biotinylated snRNA, snoRNA, rRNA, and Mitochondrial tRNA Depletion Oligos, Related to Figure 1**

Oligonucleotides were modified by the addition of a 5'-biotin-TEG and purified by HPLC.

| <b>Gene</b>                | <b>Transcript</b>     | <b>DNA sequence (5' to 3')</b>                   |
|----------------------------|-----------------------|--------------------------------------------------|
| <i>RNVU1-1</i>             | snRNA                 | CAGGGGAAAGCGCGAACGCAGTCCCCCACTACC                |
| <i>RNVU1-7</i>             | snRNA                 | CAGGGGAAAGCGCGGACGCAGTCCCCCACT                   |
| <i>RNU2-1</i>              | snRNA                 | TGCACCGTTCCTGGAGGTACTGCAATACCAGGTTCGATG          |
| <i>RNU4-1</i>              | snRNA                 | GCCTACAGCAGTCTCCGTAGAGACTGTCAAAAATTGCC<br>A      |
| <i>RNU5B-1</i>             | snRNA                 | AGCCTTGTCGGAACAAGGCCTCAAAAATTAGCTTAAG<br>AC      |
| <i>RNU5E-1</i>             | snRNA                 | AGCCTTGCCAAAGCAAGGCCTCAAAAATTGGGTTAAG            |
| <i>SNORD3D</i>             | snoRNA                | CCACTCAGACCGCGTTCTCTCCCTCTCACTCCCCAA             |
| <i>SNORD12B</i>            | snoRNA                | CAGACAGAAACTGGCTTAGAAAAGTTAGATCAACATAGT<br>CGATC |
| <i>SNORD12C</i>            | snoRNA                | CTAACTGGCAAAATATAAGACGTCAGCATTGTTCGATCTG<br>ATG  |
| <i>SNORD27</i>             | snoRNA                | CTCAGTAGTAAGATGACATCACTTGAAAGTTCAGCCATA<br>TGC   |
| <i>SNORD29</i>             | snoRNA                | CTCAGGTGTTTCATGTATTTTCACTGTCGGTCATAGTGAG<br>C    |
| <i>SNORD31</i>             | snoRNA                | TACCTTTCAGTCACACATTGATCAGACTGGGGCGGTAT           |
| <i>SNORD80</i>             | snoRNA                | CATCAGATAGGAGCGAAAGACTTAATATTGCTCATCAGC<br>G     |
| <i>SNORD81</i>             | snoRNA                | TTGTCATCAAGTAATCAGTGAGAGAGTTCAAGTTGG             |
| <i>SNORD118</i>            | snoRNA                | GGAGCAATCAGGGTGTTGCAAGACCTGATTACGCAGAG           |
| <i>RNA5S1</i>              | rRNA                  | CACCCGGTATTCCCAGGGCGGTCTCCCATCCAAGTAC            |
| <i>RNA5-8S5</i>            | rRNA                  | AGCGACGCTCAGACAGGCGTAGCCCCGGGAGG                 |
| <i>RNA28S5</i>             | rRNA                  | ACAAACCCTTGTGTCGAGGGCTGACTTTC AATAGATCG<br>CA    |
| <i>MT-TM</i><br>(ID: 4569) | mitochondrial<br>tRNA | GTACGGGAAGGGTATAACCAACATTTTCGGGGTATGGG           |
| <i>MT-TV</i><br>(ID: 4577) | mitochondrial<br>tRNA | TGGTCAGAGCGGTCAAGTTAAGTTGAAATCTCCTAAGT<br>G      |
